# Supplementary material
Source: PubMed Central journal article supplement (PMC1955623)
Supplement: brjopthal_bjo.2006.104216_1.pdf [file brjopthal_bjo.2006.104216_1.pdf]

Table 2 List of complications

| Event                                        | Associated events                                                                                                      | Frequency % (no) |
|----------------------------------------------|------------------------------------------------------------------------------------------------------------------------|------------------|
| Vitreous loss                                | Posterior capsule tears progressed to dropped nucleus in one case (0.1%) and to retinal detachment in two cases (0.2%) | 1.1% (11)        |
| Endophthalmitis                              |                                                                                                                        | 0.1% (1)         |
| Iris trauma                                  |                                                                                                                        | 1.2% (12)        |
| Clinical cystoid macular oedema              |                                                                                                                        | 1.2% (12)        |
| Wound leaks                                  | One progressed to re-operation with formal wound revision                                                              | 1.1% (11)        |
| Posterior capsule opacity or plaque          |                                                                                                                        | 0.8% (8)         |
| Posterior capsule tear without vitreous loss | Includes cases of zonule rupture                                                                                       | 0.4% (4)         |
| Progression of diabetic retinopathy          |                                                                                                                        | 0.3% (3)         |
| Hyphaema                                     |                                                                                                                        | 0.1% (1)         |
| Scleritis                                    |                                                                                                                        | 0.1% (1)         |
| Persistent post-operative uveitis            |                                                                                                                        | 1.1% (11)        |
| Persistent corneal oedema                    |                                                                                                                        | 0.7% (7)         |
| Persistent raised intraocular pressure       |                                                                                                                        | 0.3% (3)         |
| Retrobulbar haemorrhage                      |                                                                                                                        | 0.1% (1)         |
| Ptosis                                       |                                                                                                                        | 0.1% (1)         |
| <hr/>                                        |                                                                                                                        |                  |
| Any of the above events                      | Any of the above events                                                                                                | 8.7% (87)        |
